# Supplementary material
Source: MDPI journal article supplement (https://www.mdpi.com/2073-4395/11/4/616)
Supplement: s1 [file s1]

Figure S6

(a)

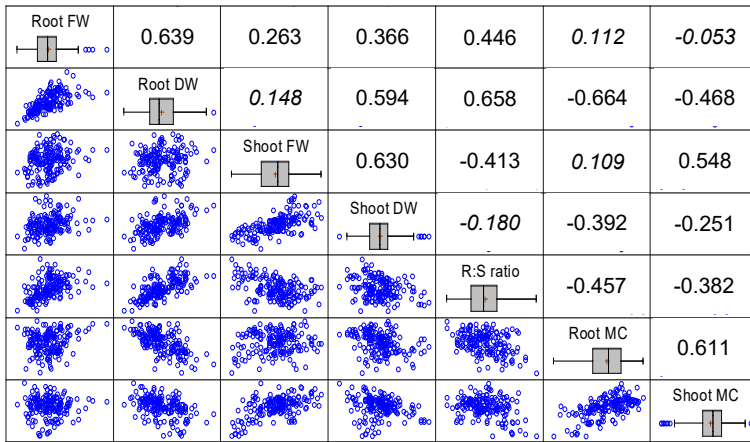

(c)

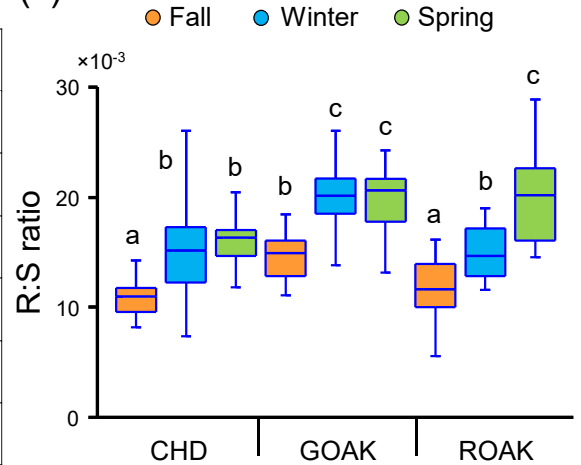

(b)

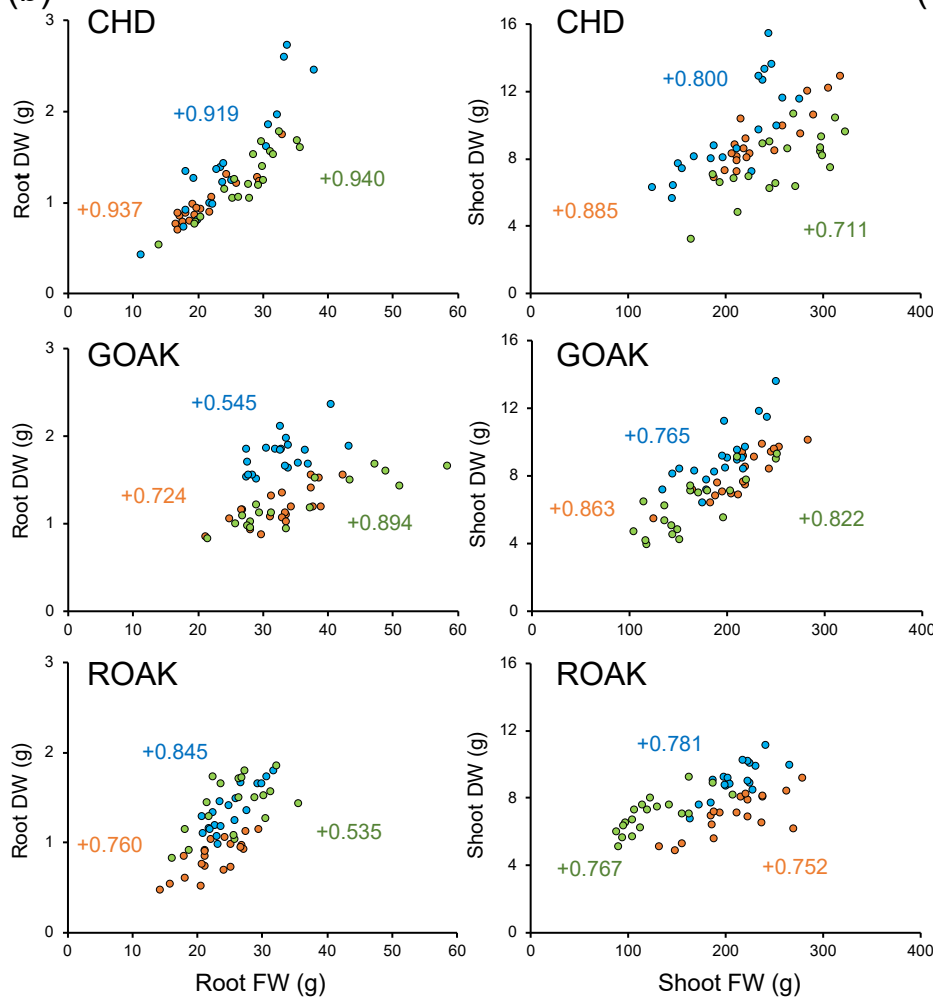

(d)

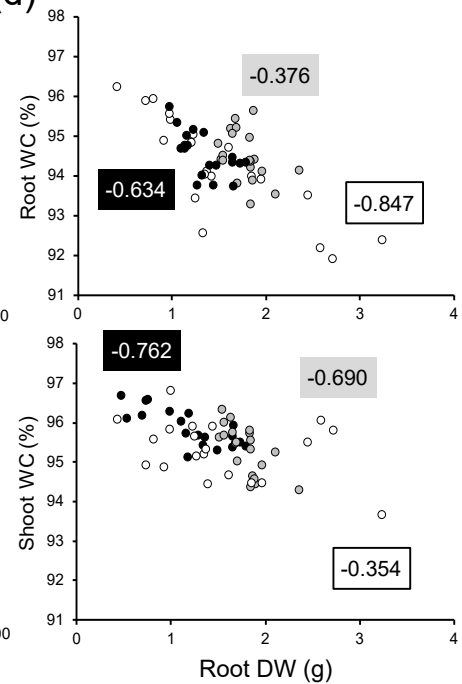

**Figure S5.** Growth quantification of the studied cultivars at 45 dap. **(a)** Scatter plots of measured traits as defined in Materials and Methods. Numbers in the upper diagonal matrix indicate Pearson's correlation between pairs of traits. **(b)** Relationship between root FW and root DW (left) and root FW and shoot FW (right). Numbers indicate Pearson's correlation in the studied seasons (Fall, orange; Winter, blue; Spring, green). **(c)** Box-plot of R:S ratio. Letters indicate significant ( $p$ -value<0.01) differences between samples. **(d)** Relationship between root DW and root WC (up) and shoot WC (down). Numbers indicate Pearson's correlation in the studied cultivars (CHD, white; GOAK, grey; ROAK, black).
