# Supplementary material
Source: MDPI journal article supplement (https://www.mdpi.com/2073-4395/11/4/616)
Supplement: s1 [file s1]

Figure S2

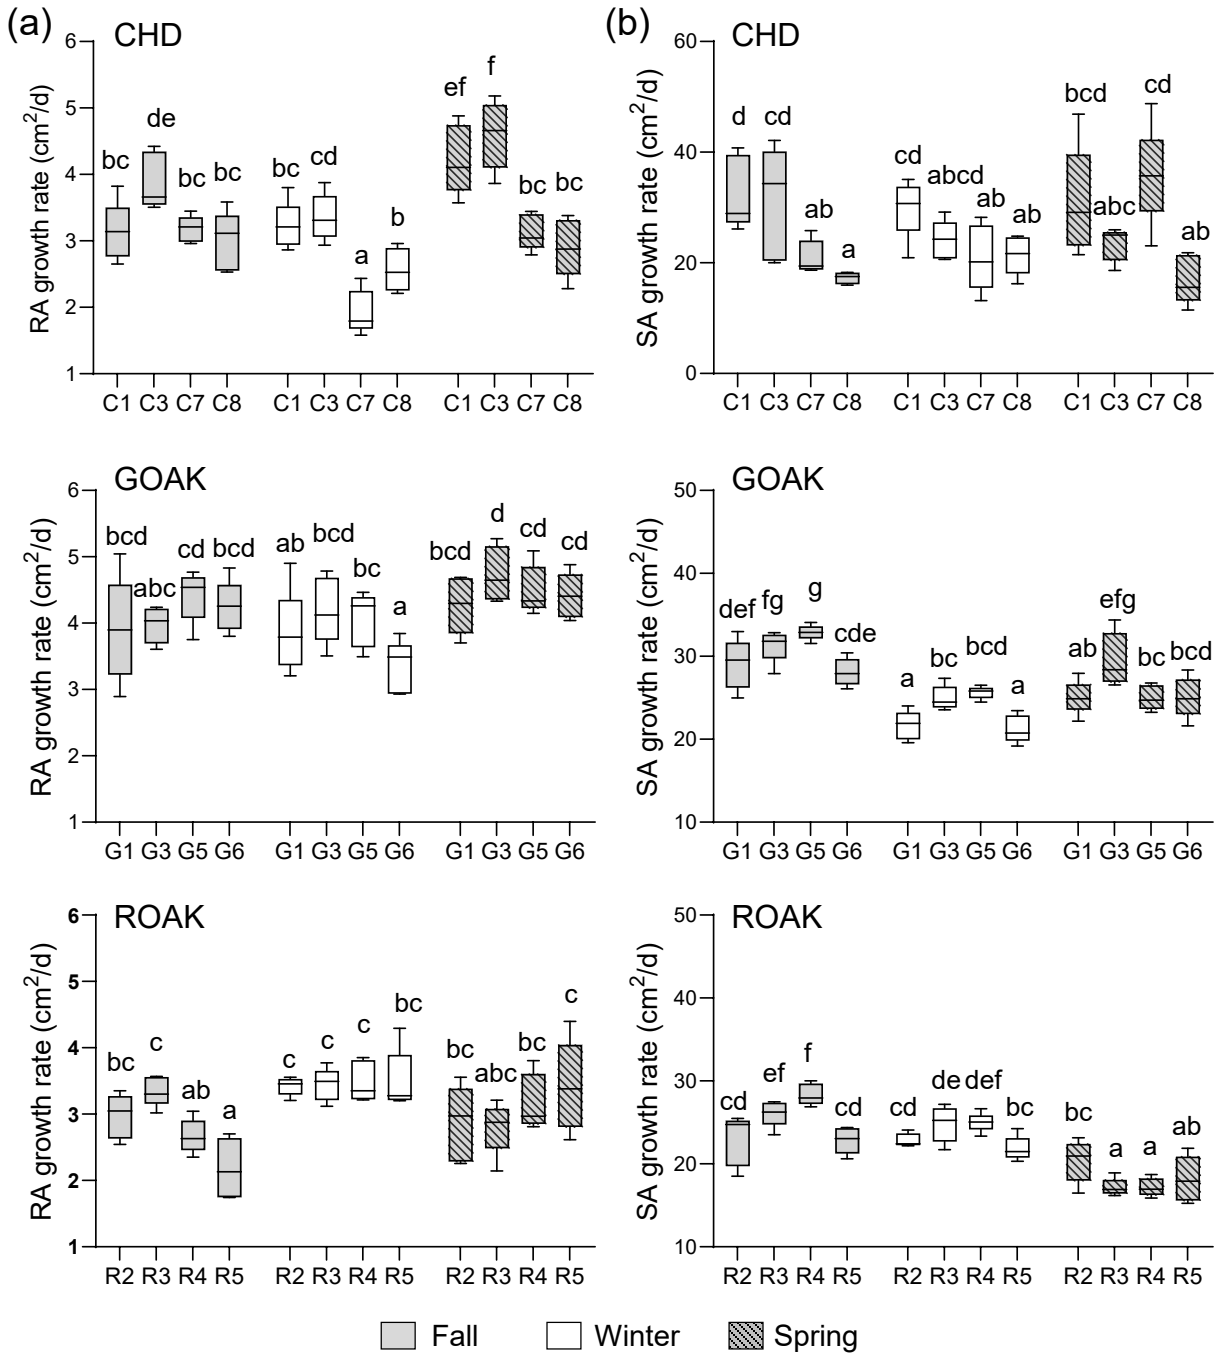

**Figure S2.** Growth rate of the studied cultivars between 0 and 35 dap. (a) Root area growth rate and (b) shoot area (SA) growth rate. Letters indicate significant ( $p$ -value $<0.01$ ) differences between CHD, GOAK and ROAK.
