# Supplementary material
Source: MDPI journal article supplement (https://www.mdpi.com/2073-4395/11/4/616)
Supplement: s1 [file s1]

Figure S3

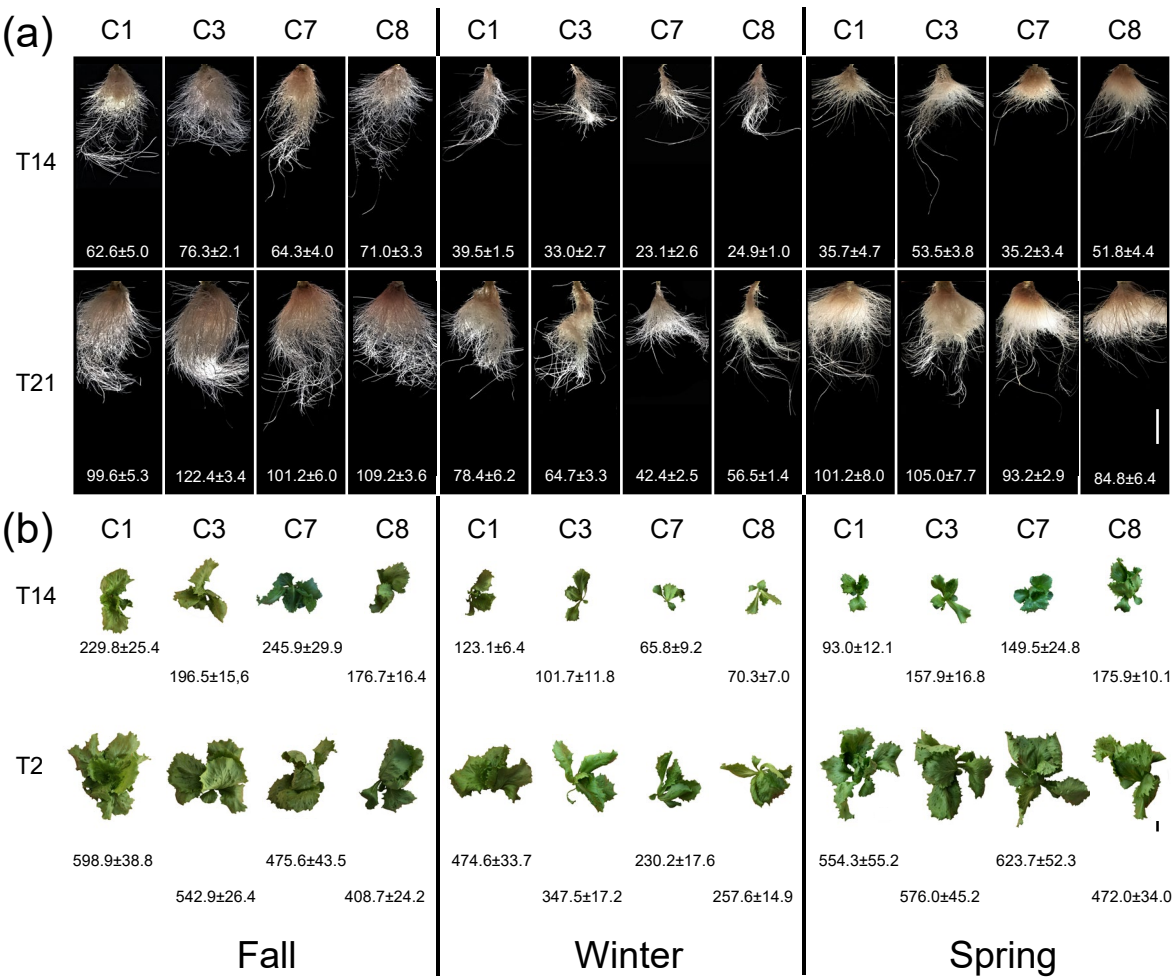

**Figure S3.** Representative images of the root (a) and the shoot (b) system of the studied CHD cultivars at 14 (T14) and 21 (T21) days after planting, respectively. Scale bar: 50 mm.
