# Supplementary material
Source: MDPI journal article supplement (https://www.mdpi.com/2073-4395/11/4/616)
Supplement: s1 [file s1]

Figure S4

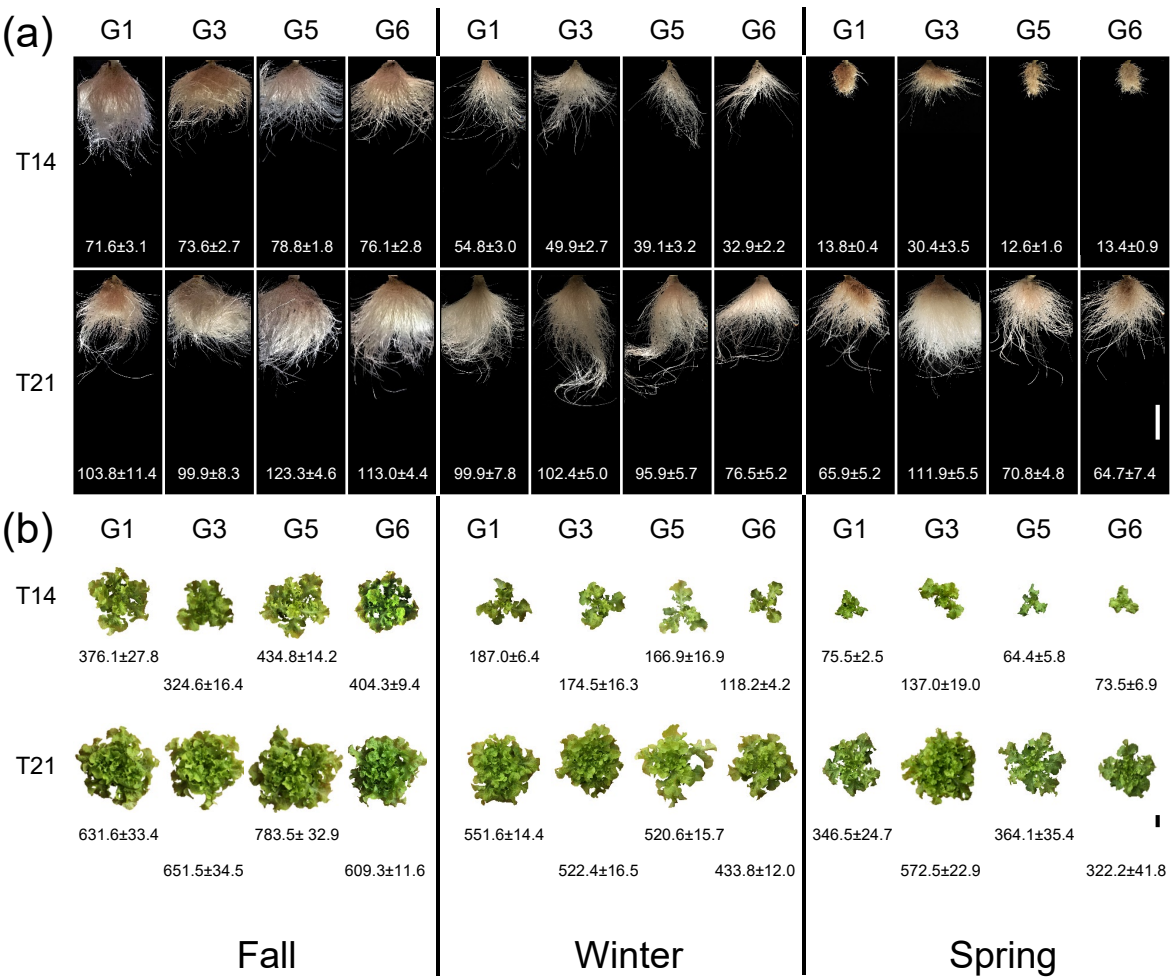

**Figure S4.** Representative images of the studied GOAK genotypes. (a,b) Details of the root (a) and the shoot (b) system of the studied GOAK cultivars at 14 and 21 dap. respectively. Scale bars: 50 mm.
