# Supplementary material
Source: MDPI journal article supplement (https://www.mdpi.com/2073-4395/11/4/616)
Supplement: s1 [file s1]

**Table S1.** Details of the experimental design used.

| Experiment | Season | Nursery chamber       | Hydroponic growth     | Photoperiod (light/dark) | Air temperature (°C) <sup>1</sup> |
|------------|--------|-----------------------|-----------------------|--------------------------|-----------------------------------|
| I          | Fall   | 21/09/2018-18/10/2018 | 18/10/2018–02/12/2018 | 11 h / 13 h              | 19.7± 3.5                         |
| II         | Winter | 02/11/2018-03/12/2018 | 03/12/2018–20/01/2019 | 10 h / 14 h              | 15.5±1.5                          |
| III        | Spring | 18/02/19-20/03/2019   | 20/03/2019–04/05/2019 | 13 h / 11 h              | 20.2±2.5                          |

<sup>1</sup> average temperature per day.**Table S2.** Nutrient solution composition (mg/L)<sup>1</sup>.

| NO <sub>3</sub> | NH <sub>4</sub> | P    | K     | Ca    | Mg   | Na  | SO <sub>4</sub> | Cl  | Fe  | B   | Cu  | Zn  | Mn  | Mo  |
|-----------------|-----------------|------|-------|-------|------|-----|-----------------|-----|-----|-----|-----|-----|-----|-----|
| 223.7           | 28.0            | 61.9 | 388.3 | 180.4 | 24.3 | 0.3 | 79.7            | 0.0 | 2.2 | 0.3 | 0.1 | 0.3 | 0.3 | 0.1 |

<sup>1</sup> pH 6.0 and 2.37 dS/m of electrical conductivity.
