# Supplementary material
Source: MDPI journal article supplement (https://www.mdpi.com/2073-4395/11/4/616)
Supplement: s1 [file s1]

Figure S1

| Scale rate  | 1                                                                                 | 2-3                                                                               | 4-5                                                                               | 6-7                                                                                | 8-9                                                                                 |
|-------------|-----------------------------------------------------------------------------------|-----------------------------------------------------------------------------------|-----------------------------------------------------------------------------------|------------------------------------------------------------------------------------|-------------------------------------------------------------------------------------|
| Example     |  |  |  |  |  |
| Description | No tipburn                                                                        | Light tipburn                                                                     | Moderate tipburn                                                                  | Severe tipburn                                                                     | Highly severe tipburn                                                               |

**Figure S1.** A representation of the scale used for tipburn severity assessment. White arrow points to an area where tipburn lesions are present. Scale bars: 50 mm.
