# Supplementary material
Source: MDPI journal article supplement (https://www.mdpi.com/2073-4395/11/4/616)
Supplement: s1 [file s1]

Figure S5

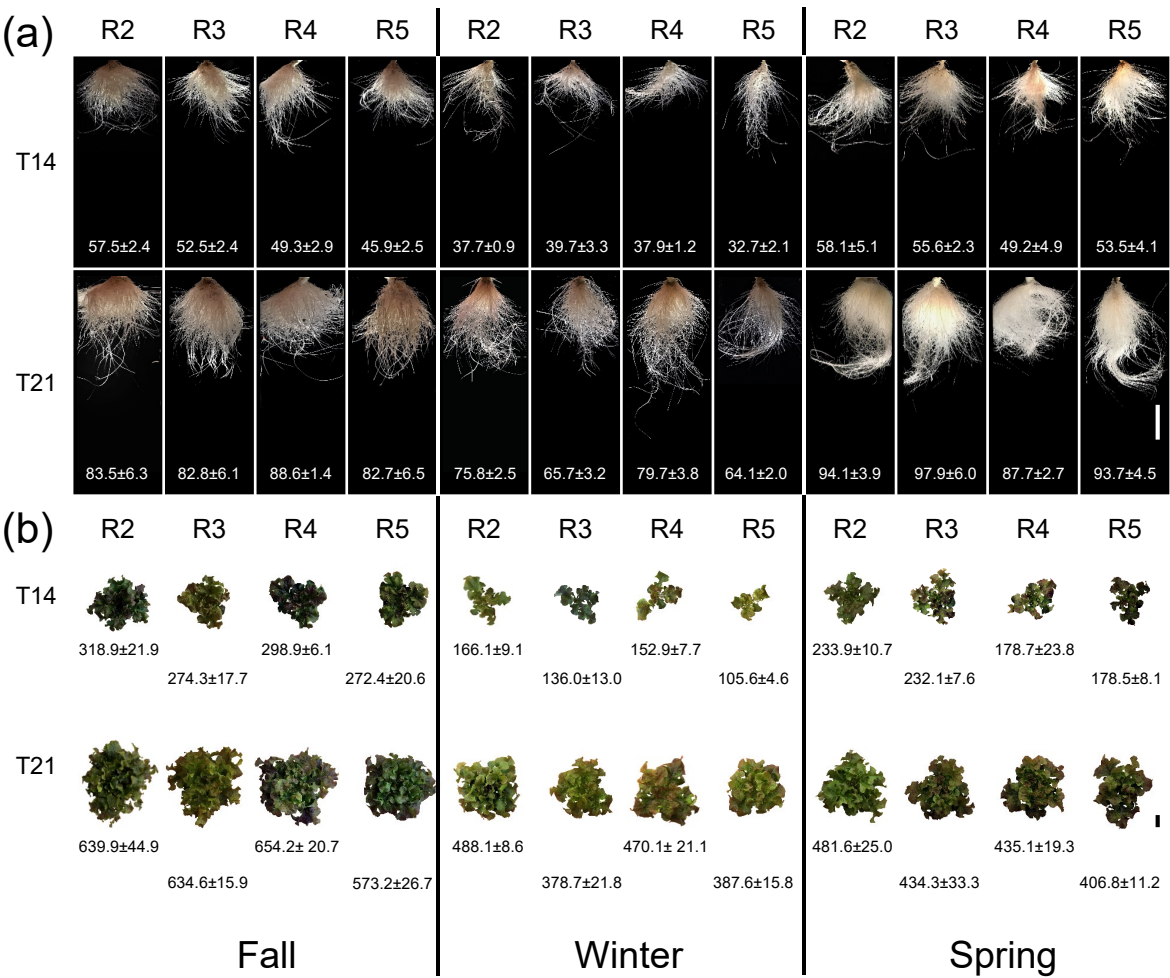

**Figure S5.** Representative images of the studied ROAK genotypes. (a,b) Details of the root (a) and the shoot (b) system of the studied ROAK cultivars at 14 (T14) and 21 (T21) dap. Scale bars: 50 mm.
